# Supplementary material for: Efficacy of acupuncture and moxibustion therapy for simple obesity in adults: A meta-analysis of randomized controlled trials
Source: PubMed Central journal article supplement — Medicine (Baltimore). 2022 Oct 28;101(43):e31148. doi: 10.1097/MD.0000000000031148 (PMC9622642; doi:10.1097/md.0000000000031148), 2022-10-28
Supplement: medi-101-e31148-s001.pdf [file medi-101-e31148-s001.pdf]

Supplemental Digital Content. Table of excluded studies.

|    | Author                                                                                                                     | Year | Title                                                                                                                                                                                | Excluded reasons                                                                   |
|----|----------------------------------------------------------------------------------------------------------------------------|------|--------------------------------------------------------------------------------------------------------------------------------------------------------------------------------------|------------------------------------------------------------------------------------|
| 01 | Lin,Z P; Li,L Y; Xie,P X                                                                                                   | 2021 | Clinical observation of traditional acupuncture and abdominal cupping combined with exercise therapy on simple obesity                                                               | Treatment groups applying other treatments apart from acupuncture                  |
| 02 | Zheng,Z Z; Luo,H; You,Q Y; Wang,J                                                                                          | 2021 | Electroacupuncture combined with nutritional intervention to treat 30 cases of simple obesity                                                                                        | Treatment groups applying other treatments apart from acupuncture                  |
| 03 | Wang, L H; Lv, S Y; Liu, Y R; Chen, X; Wang, J J; Huang, W; Zhou, Z Y                                                      | 2021 | Comparative effectiveness of herb-partitioned moxibustion plus lifestyle modification treatment for patients with simple obesity: A study protocol for a randomized controlled trial | Not RCT or literature unrelated to the purpose of the study                        |
| 04 | Chen,Q;Zhang,X X                                                                                                           | 2021 | Research overview of acupoint catgut embedding in the treatment of simple obesity                                                                                                    | Not RCT or literature unrelated to the purpose of the study                        |
| 05 | Pei,M Y                                                                                                                    | 2021 | Clinical observation of acupuncture point catgut embedding combined with moxibustion therapy on simple obesity of spleen-kidney Yang deficiency type                                 | Acupuncture treatment studies for other underlying conditions accompanying obesity |
| 06 | Zhang,Y Y; Li,P P;Gu Y J                                                                                                   | 2021 | Effect of Jin Sanzhen therapy on visceral fat in patients with simple obesity                                                                                                        | Acupuncture treatment studies for other underlying conditions accompanying obesity |
| 07 | Chen,A H                                                                                                                   | 2021 | Clinical effect analysis of acupuncture and moxibustion embedding thread for weight loss                                                                                             | Acupuncture treatment studies for other underlying conditions accompanying obesity |
| 08 | Chen, X; Huang, W; Wei, D; Ding, D G; Jiao, Y; Pan, H L; Jin, Y T; Zheng, Y W; Zhang, Y J; Zhang, Y R; Liu, Y R; Zhou, Z Y | 2020 | Clinical effect of catgut implantation at acupoints for the treatment of simple obesity: A multicentre randomized controlled trial                                                   | Treatment groups applying other treatments apart from acupuncture                  |
| 09 | Wang,Q J                                                                                                                   | 2020 | Effect and mechanism of Du moxibustion on prevention and treatment of simple obesity of phlegm-dampness constitution                                                                 | Acupuncture treatment studies for other underlying conditions accompanying obesity |
| 10 | Fan,S;Zhang,Z Y;Pan,J J;Cao,C Y;Wei,J;Wang,Q L                                                                             | 2020 | Clinical study of acupuncture and cupping combined therapy in the treatment of simple obesity with dampness resistance of spleen                                                     | Acupuncture treatment studies for other underlying conditions accompanying obesity |
| 11 | Wang, J J; Huang, W; Wei, D; Yang, T Y; Zhou, Z Y                                                                          | 2019 | Comparison of therapeutic effects of electroacupuncture and acupoint catgut embedding in redu-cing serum leptin and insulin levels in simple obesity patients                        | Treatment groups applying other treatments apart from acupuncture                  |
| 12 | Li,P; Dai,W                                                                                                                | 2019 | Observation of curative effect of electroacupuncture on simple obesity                                                                                                               | Treatment groups applying other treatments apart from acupuncture                  |
| 13 | Chen D; Jiang,Q                                                                                                            | 2019 | To observe the clinical effect of electroacupuncture combined with aerobic exercise on simple obesity based on body composition analysis                                             | Not RCT or literature unrelated to the purpose of the study                        |
| 14 | Zheng,Z J                                                                                                                  | 2019 | Experimental study of moxibustion on simple obesity in college students                                                                                                              | Not RCT or literature unrelated to the purpose of the study                        |
| 15 | Yang,L                                                                                                                     | 2019 | Effect of acupuncture and moxibustion on inflammatory indexes of blood lipid status and effect of weight loss in patients with simple                                                | Acupuncture treatment studies for other underlying conditions accompanying obesity |
| 16 | Shi,J; Zhu,X J; Guo Hailian; JiRong                                                                                        | 2018 | Effect of acupuncture and moxibustion on inflammatory indexes of blood lipid status and effect of weight loss in patients with simple                                                | Treatment groups applying other treatments apart from acupuncture                  |
| 17 | Sun,H L                                                                                                                    | 2018 | Effect of acupuncture and moxibustion on simple obesity with dampness resistance of spleen deficiency                                                                                | Acupuncture treatment studies for other underlying conditions accompanying obesity |
| 18 | Xie,W T                                                                                                                    | 2018 | Clinical study of acupuncture combined with exercise therapy in the treatment of simple obesity with dampness resistance of spleen                                                   | Acupuncture treatment studies for other underlying conditions accompanying obesity |

|    |                                                                                                   |      |                                                                                                                                                                     |                                                                                    |
|----|---------------------------------------------------------------------------------------------------|------|---------------------------------------------------------------------------------------------------------------------------------------------------------------------|------------------------------------------------------------------------------------|
| 19 | Liang,J C                                                                                         | 2017 | Study on the method of losing weight by acupuncture and moxibustion in simple obesity                                                                               | Not RCT or literature unrelated to the purpose of the study                        |
| 20 | Ding,L L; Ma,Q J; Ma,J H                                                                          | 2016 | Clinical observation on 60 cases of simple obesity treated by Yangming Five Elements acupuncture                                                                    | Not RCT or literature unrelated to the purpose of the study                        |
| 21 | Xiong,W; Yuan,H J; Ruo,S Y; Pan,P H                                                               | 2016 | Therapeutic effect of acupuncture on 29 cases of simple obesity                                                                                                     | Not RCT or literature unrelated to the purpose of the study                        |
| 22 | Zhang,S Q; Wu,J Q                                                                                 | 2016 | Clinical observation on 120 cases of simple obesity with spleen deficiency and phlegm dampness treated by acupuncture                                               | Acupuncture treatment studies for other underlying conditions accompanying obesity |
| 23 | Zhang,Z Y; Liu J; Chen D D; Tang,H Z                                                              | 2015 | Effectiveness analysis of acupuncture and moxibustion in treating simple obesity                                                                                    | Treatment groups applying other treatments apart from acupuncture                  |
| 24 | Su,W L                                                                                            | 2015 | Clinical observation of acupoint catgut embedding combined with box moxibustion in the treatment of simple obesity with deficiency syndrome                         | Acupuncture treatment studies for other underlying conditions accompanying obesity |
| 25 | Lin,X M                                                                                           | 2015 | Clinical study of acupoint catgut embedding in the treatment of simple obesity                                                                                      | Acupuncture treatment studies for other underlying conditions accompanying obesity |
| 26 | Wang,A J                                                                                          | 2013 | Efficacy evaluation of acupoint catgut embedding in the treatment of simple obesity                                                                                 | Acupuncture treatment studies for other underlying conditions accompanying obesity |
| 27 | Wang,J H;Chen,X Q;Sheng,Y J;Huang,C J;Zhong,C Y;Ma,M;Tan,H Q;Hu,Y Z;Cai,J;Zheng,X C;Wang,Q C;Du,W | 2012 | Clinical study on the treatment of simple obesity with six acupuncture in abdomen                                                                                   | Treatment groups applying other treatments apart from acupuncture                  |
| 28 | Zhang,M;Sun,X H                                                                                   | 2012 | Clinical study on the treatment of simple obesity with dampness of spleen deficiency by ear pressure and moxibustion                                                | Acupuncture treatment studies for other underlying conditions accompanying obesity |
| 29 | Hu,X B; Yan,Y                                                                                     | 2011 | Effect of acupoint catgut embedding on blood lipids in 56 patients with simple obesity                                                                              | Not RCT or literature unrelated to the purpose of the study                        |
| 30 | Gao,H; Xing,H J;Yang,J J; Xiao,H L                                                                | 2010 | Effect of acupuncture combined with diet adjusted aerobic exercise on BMI of patients with simple obesity                                                           | Treatment groups applying other treatments apart from acupuncture                  |
| 31 | Cai,J Z; Li,X L; Jiang,H L                                                                        | 2010 | Observation on the curative effect of eight points acupuncture and cupping around umbilicus on simple obesity                                                       | Treatment groups applying other treatments apart from acupuncture                  |
| 32 | Yang, J J; Xing, H J; Xiao, H L; Li, Q; Li, M; Wang, S J                                          | 2010 | Effects of acupuncture combined with diet adjustment and aerobic exercise on weight and waist-hip ratio in simple obesity patients                                  | Not RCT or literature unrelated to the purpose of the study                        |
| 33 | Han,Q Z                                                                                           | 2010 | Clinical observation of 30 cases of simple obesity treated by acupuncture and auricular point sticking                                                              | Not RCT or literature unrelated to the purpose of the study                        |
| 34 | Pan,Y; Tong,J; Chen,J X;Zhang,Z Q; Yao,H                                                          | 2010 | Clinical observation on the effect of acupuncture on appetite regulation in simple obesity patients                                                                 | Not RCT or literature unrelated to the purpose of the study                        |
| 35 | Yang, J J; Xing, H J; Wang,S J; Xiao, H L; Li, Q; Li, M; Li,Q                                     | 2010 | Effects of acupuncture combined with diet adjustment and aerobic exercise on body mass index and serum leptin content in patients with simple obesity               | Not RCT or literature unrelated to the purpose of the study                        |
| 36 | Liu,P; Gu,H Y                                                                                     | 2010 | Clinical observation on 63 cases of simple obesity with dampness resistance of spleen deficiency treated by warm acupuncture combined with auricular point sticking | Acupuncture treatment studies for other underlying conditions accompanying obesity |
| 37 | Zhao,L Q; Shi,Y                                                                                   | 2010 | Clinical study of electroacupuncture combined with diet and exercise therapy in the treatment of gastrointestinal solid heat type simple                            | Acupuncture treatment studies for other underlying conditions accompanying obesity |

|    |                                                 |      |                                                                                                                                                       |                                                                                    |
|----|-------------------------------------------------|------|-------------------------------------------------------------------------------------------------------------------------------------------------------|------------------------------------------------------------------------------------|
| 38 | Luo,R H; Chen,X L; Xu,K                         | 2009 | Thunder fire moxibustion for treating 30 cases of simple obesity                                                                                      | Treatment groups applying other treatments apart from acupuncture                  |
| 39 | Xing, H J                                       | 2009 | Clinical study of acupuncture combined with diet adjustment and aerobic exercise in treating simple obesity                                           | Treatment groups applying other treatments apart from acupuncture                  |
| 40 | Chen,Y                                          | 2009 | Clinical observation on the treatment of female simple obesity with acupuncture and electroacupuncture combined with auricular acupoint pressure seed | Not RCT or literature unrelated to the purpose of the study                        |
| 41 | Chen,Z X                                        | 2008 | Therapeutic effect of acupuncture combined with diet control on simple obesity                                                                        | Not RCT or literature unrelated to the purpose of the study                        |
| 42 | Han,H R; Song,G L; Zhang,H P; Wang,G F; Zhang,F | 2008 | Clinical comparative study of acupuncture in the treatment of simple obesity                                                                          | Not RCT or literature unrelated to the purpose of the study                        |
| 43 | Song,S J                                        | 2007 | Clinical study of acupuncture - based comprehensive treatment of simple obesity                                                                       | Treatment groups applying other treatments apart from acupuncture                  |
| 44 | Chen,J X; Tong,J; Yao,H; Zhang,Z Q; Huang S H   | 2007 | Clinical effectiveness analysis of abdominal acupuncture in the treatment of simple obesity                                                           | Not RCT or literature unrelated to the purpose of the study                        |
| 45 | Nie,L; Zhan,Z Q; Yang,L Q; Tang,X L             | 2007 | Clinical study on treating simple obesity by acupuncture at 8 points around umbilicus                                                                 | Not RCT or literature unrelated to the purpose of the study                        |
| 46 | Wang,S J; Kang,S B                              | 2007 | Clinical observation on simple obesity treated by acupuncture and auricular point sticking                                                            | Not RCT or literature unrelated to the purpose of the study                        |
| 47 | Luo,S H                                         | 2007 | Clinical observation on 60 cases of simple obesity treated by acupuncture                                                                             | Acupuncture treatment studies for other underlying conditions accompanying obesity |
| 48 | Li,J Z                                          | 2007 | Clinical study on acupuncture treatment of simple obesity (dampness of spleen deficiency)                                                             | Acupuncture treatment studies for other underlying conditions accompanying obesity |
| 49 | Zhang,Y; Cui,H                                  | 2007 | Clinical effect of acupuncture on simple obesity with deficiency of heart and spleen                                                                  | Acupuncture treatment studies for other underlying conditions accompanying obesity |
| 50 | Wu,J J; Wang,H Y; Zhou,Q D                      | 2006 | Clinical observation on 108 cases of simple obesity treated by acupuncture combined with scraping                                                     | Treatment groups applying other treatments apart from acupuncture                  |
| 51 | Ji,X S                                          | 2006 | Observation on 68 cases of simple obesity treated by electroacupuncture sequence therapy                                                              | Not RCT or literature unrelated to the purpose of the study                        |
| 52 | Dong,X Y                                        | 2005 | Clinical study on acupuncture treatment of simple obesity                                                                                             | Not RCT or literature unrelated to the purpose of the study                        |
| 53 | Kang,S B; Gao,X L; Wang,S J; Wang,Y J           | 2005 | Acupuncture in the treatment of simple obesity and its effect on serum leptin                                                                         | Not RCT or literature unrelated to the purpose of the study                        |
| 54 | Lei,Y; Hua,Y H                                  | 2005 | Clinical study of abdominal acupuncture combined with auricular point sticking in treatment of simple obesity                                         | Not RCT or literature unrelated to the purpose of the study                        |
| 55 | Li,Z T                                          | 2005 | Clinical study on 59 cases of simple obesity treated by electroacupuncture combined with acupoint catgut embedding                                    | Acupuncture treatment studies for other underlying conditions accompanying obesity |
| 56 | Wang,W Y                                        | 2001 | Clinical observation on acupuncture treatment of 60 cases of simple obesity                                                                           | Not RCT or literature unrelated to the purpose of the study                        |
